# Supplementary material for: Engineering of ternary co-crystals based on differential binding of guest molecules by a tetraarylpyrene inclusion host
Source: Royal Society of Chemistry journal article supplement (doi:10.1039/b922085b), 2010-01-01
Supplement: b922085b.pdf [file b922085b.pdf]

## Supporting Information

### Engineering of Ternary Co-Crystals Based on Differential Binding of Guest Molecules by a Tetraarylpyrene Inclusion Host

Jarugu Narasimha Moorthy,<sup>\*</sup> Palani Natarajan and P. Venugopalan

<sup>†</sup>*Department of Chemistry, Indian Institute of Technology, Kanpur 208 016, INDIA*

*Department of Chemistry, Panjab University, Chandigarh 160014, INDIA*

---

#### Table of Contents

---

|    |                                                                                                                                          |           |
|----|------------------------------------------------------------------------------------------------------------------------------------------|-----------|
| 1. | Experimental section                                                                                                                     | S02 – S03 |
| 2. | Experimental details of crystal structure refinements                                                                                    | S04 – S05 |
| 3. | Calculated angles between the mean planes of 2,6-dimethylanisyl rings and the central pyrene ring of <b>TP</b>                           | S06       |
| 4. | Ranges of weak intermolecular interactions noticed in the inclusion compounds of <b>TP</b> with different guest molecules                | S06       |
| 5. | Structures of the guests used for inclusion with host <b>TP</b>                                                                          | S07       |
| 5. | The weak C–H···O hydrogen bonds observed in the inclusion compounds of <b>TP</b> with different guest molecules                          | S08       |
| 5. | The weak C–H··· $\pi$ and $\pi$ ··· $\pi$ hydrogen bonds observed in the inclusion compounds of <b>TP</b> with different guest molecules | S08       |
| 6. | The TGA plots for the ternary inclusion compound of <b>TP</b>                                                                            | S09       |
| 7. | The experimental and simulated PXRD profiles for the inclusion compounds of <b>TP</b>                                                    | S09 – S11 |
| 8. | <sup>1</sup> H NMR spectra for the ternary inclusion compounds of <b>TP</b>                                                              | S12 – S14 |
| 9. | Crystal packing arrangement of <b>TP</b> with guest molecules                                                                            | S15 – S19 |

---

## EXPERIMENTAL SECTION

Anhyd tetrahydrofuran (THF) was freshly distilled over sodium prior to use. All other solvents were distilled prior to use. The progress of reactions was monitored by analytical thin layer chromatography (TLC) using aluminum sheets pre-coated with silica gel. Column chromatography was conducted with silica gel (60-120  $\mu\text{m}$  mesh).  $^1\text{H}$  and  $^{13}\text{C}$  NMR spectra were recorded on 400 and 500 MHz spectrometers using deuterated solvents. TGA and DSC measurements were carried out at a heating rate of 10  $^{\circ}\text{C}/\text{min}$  under nitrogen gas atmosphere. Commercial chemicals were used as received. X-ray powder patterns were recorded on a Rigaku X-ray diffractometer.

### Synthesis of Tetrarylpyrene **TP**

The synthesis of tetrarylpyrene **TP** involved 4-fold Suzuki coupling of 1,3,6,8-tetrabromopyrene with 2,6-dimethyl-4-methoxyphenylboronic acid using  $\text{Pd}(\text{PPh}_3)_4$  as a catalyst, and has been previously reported by us.<sup>1</sup>

### General Procedure for Synthesis of Ternary Inclusion Compounds

A 1:2 mixture of host **TP** and solid guest were dissolved in a minimum amount of appropriate liquid guest. Slow evaporation of the resultant solution over a period of two weeks led to colorless crystals quantitatively. When both guests were liquids, the low boiling guest was used in excess for crystallization. The crystal structures of ternary inclusion compounds of **TP** with guest molecules in Chart 1 were determined by X-ray crystallography. The details of crystal data and structure determination are given in Table 1. In most cases, the guest inclusion was independently established by TGA,  $^1\text{H}$  NMR spectroscopy GC and PXRD analyses.

**X-Ray Crystal Structure Determination.** A good quality crystal in each case was mounted in a glass capillary, cooled to 100/298 K, and the intensity data were collected on a Bruker Nonius SMART APEX CCD detector system with Mo-sealed Siemens ceramic diffraction tube ( $\lambda = 0.71073$ ) and a highly oriented graphite monochromator operating at 50 kV and 30 mA. The data were collected on a hemisphere mode and processed with Bruker SAINTPLUS. Empirical absorption correction was made using Bruker SADABS. The structure was solved in each case by Direct Methods using SHELXTL package and refined by full matrix least-squares method based on  $F^2$  using SHELX97 program.<sup>2</sup> All the non-hydrogen atoms were refined anisotropically. The hydrogen atoms were included in the ideal positions with fixed isotropic U values and were riding with their respective non-hydrogen atoms. The experimental details of crystal data, intensity measurements, structure solution and refinements are presented in Table 1.

## References

- 1 (a) J. N. Moorthy, P. Natarajan, P. Venkatakrishnan, D-F. Huang, T. J. Chow, *Org. Lett.* **2007**, 9, 5215.
- 2 SHELX97 Program for the Refinement and Solution of Crystal Structures; G. M. Sheldrick, University of Gottingen: Gottingen, Germany, 1997.

**Table 1.** The Crystal data for the Ternary Inclusion Compounds of **TP**.

| Identification code                               | <b>TP-PO</b>                                         | <b>TP-PC</b>                                                   | <b>TP-MC</b>                                                   | <b>TP-PB</b>                                         |
|---------------------------------------------------|------------------------------------------------------|----------------------------------------------------------------|----------------------------------------------------------------|------------------------------------------------------|
| Empirical formula                                 | C <sub>68</sub> H <sub>71</sub> O <sub>4</sub>       | C <sub>69</sub> H <sub>61</sub> Cl <sub>3</sub> O <sub>4</sub> | C <sub>62</sub> H <sub>63</sub> Cl <sub>3</sub> O <sub>4</sub> | C <sub>74</sub> H <sub>66</sub> O <sub>4</sub>       |
| Formula weight                                    | 952.25                                               | 1060.53                                                        | 978.47                                                         | 1019.27                                              |
| Temperature (K)                                   | 100(2)                                               | 100(2)                                                         | 100(2)                                                         | 100(2)                                               |
| Wavelength (Å)                                    | 0.71073                                              | 0.71073                                                        | 0.71073                                                        | 0.71073                                              |
| Crystal system                                    | Monoclinic                                           | Monoclinic                                                     | Monoclinic                                                     | Monoclinic                                           |
| Space group                                       | <i>P</i> <sub>2</sub> /n (no. 14)                    | <i>P</i> <sub>2</sub> /c (no. 14)                              | <i>P</i> <sub>2</sub> /n (no. 14)                              | <i>P</i> <sub>2</sub> /c (no. 14)                    |
| a (Å)                                             | 18.140(3)                                            | 25.857(5)                                                      | 13.594(4)                                                      | 14.678(7)                                            |
| b (Å)                                             | 15.209(2)                                            | 15.118(3)                                                      | 15.769(4)                                                      | 14.855(5)                                            |
| c (Å)                                             | 19.375(3)                                            | 13.916(2)                                                      | 24.726(7)                                                      | 14.259(1)                                            |
| α (deg)                                           | 90.00                                                | 90.00                                                          | 90.00                                                          | 90.00                                                |
| β (deg)                                           | 96.41                                                | 93.23                                                          | 99.67                                                          | 118.63(2)                                            |
| γ (deg)                                           | 90.00                                                | 90.00                                                          | 90.00                                                          | 90.00                                                |
| Volume (Å <sup>3</sup> )                          | 5312.1(14)                                           | 5431.1(16)                                                     | 5225.0(2)                                                      | 2728.3(5)                                            |
| Z                                                 | 4                                                    | 4                                                              | 4                                                              | 2                                                    |
| Calculated density (mg/m <sup>3</sup> )           | 1.191                                                | 1.297                                                          | 1.244                                                          | 1.241                                                |
| Absorption coefficient (mm <sup>-1</sup> )        | 0.072                                                | 0.221                                                          | 0.223                                                          | 0.075                                                |
| F(000)                                            | 2044                                                 | 2232                                                           | 2072                                                           | 1084                                                 |
| Theta range for data collection (°)               | 2.11 to 25.50                                        | 2.07 to 25.00                                                  | 1.99 to 26.00                                                  | 2.09 to 25.00                                        |
| Scan type                                         | 2θ-θ                                                 | 2θ-θ                                                           | 2θ-θ                                                           | 2θ-θ                                                 |
| Index ranges                                      | -21 ≤ h ≤ 20,<br>-13 ≤ k ≤ 18,<br>-23 ≤ l ≤ 22       | -21 ≤ h ≤ 30,<br>-17 ≤ k ≤ 17,<br>-14 ≤ l ≤ 16                 | -14 ≤ h ≤ 16,<br>-18 ≤ k ≤ 19,<br>-30 ≤ l ≤ 30                 | -17 ≤ h ≤ 17,<br>-17 ≤ k ≤ 12,<br>-14 ≤ l ≤ 16       |
| Reflections collected                             | 27714                                                | 27548                                                          | 28710                                                          | 13867                                                |
| Independent reflections                           | 9811 [R(int) = 0.0746]                               | 9512 [R(int) = 0.0708]                                         | 10216 [R(int) = 0.0745]                                        | 4780 [R(int) = 0.0495]                               |
| Refinement method                                 | Full-matrix least-squares on <i>F</i> <sup>2</sup>   | Full-matrix least-squares on <i>F</i> <sup>2</sup>             | Full-matrix least-squares on <i>F</i> <sup>2</sup>             | Full-matrix least-squares on <i>F</i> <sup>2</sup>   |
| Data/restraints/parameters                        | 9811/20/695                                          | 9512/0/685                                                     | 10216/0/637                                                    | 4780/0/352                                           |
| Goodness-of-fit on <i>F</i> <sup>2</sup>          | 1.053                                                | 1.060                                                          | 1.036                                                          | 1.028                                                |
| Final R indices [I > 2σ(I)]                       | R <sub>1</sub> = 0.0684,<br>wR <sub>2</sub> = 0.1571 | R <sub>1</sub> = 0.0699,<br>wR <sub>2</sub> = 0.1568           | R <sub>1</sub> = 0.0598,<br>wR <sub>2</sub> = 0.1302           | R <sub>1</sub> = 0.0550,<br>wR <sub>2</sub> = 0.1219 |
| R indices (all data)                              | R <sub>1</sub> = 0.1182,<br>wR <sub>2</sub> = 0.1787 | R <sub>1</sub> = 0.1147,<br>wR <sub>2</sub> = 0.1791           | R <sub>1</sub> = 0.0987,<br>wR <sub>2</sub> = 0.1515           | R <sub>1</sub> = 0.0888,<br>wR <sub>2</sub> = 0.1355 |
| Largest diff. peak and hole (e. Å <sup>-3</sup> ) | 0.300 and<br>-0.273                                  | 0.243 and<br>-0.172                                            | 0.356 and<br>-0.410                                            | 0.244 and<br>-0.180                                  |
| Host:Guest                                        | <b>1 : 0.5 : 1</b>                                   | <b>1 : 1 : 1</b>                                               | <b>1 : 1 : 1</b>                                               | <b>1 : 1 : 1</b>                                     |

| Identification code                               | TP-NP                                                | TP-FB                                                | TP-AO                                                | TP-BM                                                |
|---------------------------------------------------|------------------------------------------------------|------------------------------------------------------|------------------------------------------------------|------------------------------------------------------|
| Empirical formula                                 | C <sub>70</sub> H <sub>64</sub> O <sub>4</sub>       | C <sub>71</sub> H <sub>66</sub> O <sub>4</sub>       | C <sub>67</sub> H <sub>71</sub> O <sub>4</sub>       | C <sub>63</sub> H <sub>65</sub> NO <sub>6</sub>      |
| Formula weight                                    | 969.21                                               | 983.24                                               | 940.24                                               | 932.16                                               |
| Temperature (K)                                   | 100(2)                                               | 100(2)                                               | 100(2)                                               | 293(2)                                               |
| Wavelength (Å)                                    | 0.71073                                              | 0.71073                                              | 0.71073                                              | 0.71073                                              |
| Crystal system                                    | Monoclinic                                           | Monoclinic                                           | Monoclinic                                           | Orthorhombic                                         |
| Space group                                       | <i>P</i> 2 <sub>1</sub> /n (no. 14)                  | <i>P</i> 2 <sub>1</sub> /n (no. 14)                  | <i>P</i> 2 <sub>1</sub> /n (no. 14)                  | <i>Pca</i> 2 <sub>1</sub> (no. 29)                   |
| a (Å)                                             | 14.001(5)                                            | 14.433(7)                                            | 18.050(6)                                            | 14.829(4)                                            |
| b (Å)                                             | 14.840(5)                                            | 14.189(4)                                            | 15.120(5)                                            | 15.582(5)                                            |
| c (Å)                                             | 14.493(5)                                            | 14.865(6)                                            | 19.430(6)                                            | 23.732(7)                                            |
| α (deg)                                           | 90.00                                                | 90.00                                                | 90.00                                                | 90.00                                                |
| β (deg)                                           | 117.09                                               | 118.02(2)                                            | 98.44(3)                                             | 90.00                                                |
| γ (deg)                                           | 90.00                                                | 90.00                                                | 90.00                                                | 90.00                                                |
| Volume (Å <sup>3</sup> )                          | 2681.2(17)                                           | 2687.0(5)                                            | 5245.0(3)                                            | 5484.0(3)                                            |
| Z                                                 | 2                                                    | 2                                                    | 4                                                    | 4                                                    |
| Calculated density (mg/m <sup>3</sup> )           | 1.201                                                | 1.215                                                | 1.191                                                | 1.129                                                |
| Absorption coefficient (mm <sup>-1</sup> )        | 0.073                                                | 0.074                                                | 0.072                                                | 0.071                                                |
| F(000)                                            | 1032                                                 | 1048                                                 | 2020                                                 | 1992                                                 |
| Theta range for data collection (°)               | 2.09 to 25.00                                        | 2.11 to 25.00                                        | 2.14 to 25.00                                        | 2.08 to 25.00                                        |
| Scan type                                         | 2θ-θ                                                 | 2θ-θ                                                 | 2θ-θ                                                 | 2θ-θ                                                 |
| Index ranges                                      | -16≤h≤15,<br>-14≤k≤17,<br>-14≤l≤17                   | -17≤h≤14,<br>-16≤k≤14,<br>-14≤l≤17                   | -21≤h≤16,<br>-16≤k≤17,<br>-23≤l≤20                   | -15≤h≤17,<br>-18≤k≤17,<br>-27≤l≤28                   |
| Reflections collected                             | 13498                                                | 13616                                                | 26547                                                | 27514                                                |
| Independent reflections                           | 4694 [R(int) = 0.0497]                               | 4674 [R(int) = 0.0505]                               | 9162 [R(int) = 0.0510]                               | 9470 [R(int) = 0.0681]                               |
| Refinement method                                 | Full-matrix least-squares on <i>F</i> <sup>2</sup>   |
| Data/restraints/parameters                        | 4694/2/369                                           | 4674/42/397                                          | 9162/32/714                                          | 9470/207/705                                         |
| Goodness-of-fit on <i>F</i> <sup>2</sup>          | 1.042                                                | 1.025                                                | 1.058                                                | 1.056                                                |
| Final R indices [I>2σ(I)]                         | R <sub>1</sub> = 0.0571,<br>wR <sub>2</sub> = 0.1452 | R <sub>1</sub> = 0.0569,<br>wR <sub>2</sub> = 0.1279 | R <sub>1</sub> = 0.0673,<br>wR <sub>2</sub> = 0.1645 | R <sub>1</sub> = 0.0944,<br>wR <sub>2</sub> = 0.2098 |
| R indices (all data)                              | R <sub>1</sub> = 0.0768,<br>wR <sub>2</sub> = 0.1589 | R <sub>1</sub> = 0.0903,<br>wR <sub>2</sub> = 0.1432 | R <sub>1</sub> = 0.1003,<br>wR <sub>2</sub> = 0.1827 | R <sub>1</sub> = 0.1601,<br>wR <sub>2</sub> = 0.2424 |
| Largest diff. peak and hole (e. Å <sup>-3</sup> ) | 0.305 and<br>-0.232                                  | 0.221 and<br>-0.212                                  | 0.643 and<br>-0.410                                  | 0.515 and<br>-0.245                                  |
| Host:Guest                                        | <b>1 : 1 : 1</b>                                     | <b>1 : 1 : 1</b>                                     | <b>1 : 0.5 : 1</b>                                   | <b>1 : 1 : 1</b>                                     |

**Table 2.** The Calculated Angles (deg) Between the Mean Planes of the Aryl Rings (Involving Carbon Atoms of the Phenyl Ring) the Central Pyrene Ring (All 16 Carbons), and the Guest Accessible Volume in all Structures of **TP** with Guest Molecules.

| No | code         | angles (deg) |       | V (%) | No | code         | angles (deg) |       | V (%) |
|----|--------------|--------------|-------|-------|----|--------------|--------------|-------|-------|
| 1  | <b>TP-PO</b> | 77.24        | 89.88 | 29.6  | 5  | <b>TP-NP</b> | 84.23        | 86.28 | 31.7  |
|    |              | 84.02        | 87.03 |       |    |              |              |       |       |
| 2  | <b>TP-PC</b> | 79.13        | 87.04 | 31.9  | 6  | <b>TP-FB</b> | 86.09        | 88.60 | 31.9  |
|    |              | 84.63        | 86.73 |       |    |              |              |       |       |
| 3  | <b>TP-MC</b> | 83.07        | 87.16 | 30.4  | 7  | <b>TP-AO</b> | 81.92        | 88.76 | 28.4  |
|    |              | 85.11        | 87.31 |       |    |              | 82.43        | 83.92 |       |
| 4  | <b>TP-PB</b> | 82.92        | 86.42 | 32.1  | 8  | <b>TP-BM</b> | 78.61        | 82.48 | 33.0  |
|    |              |              |       |       |    |              | 81.39        | 84.83 |       |

V = guest-accessible volume

**Table 3.** The Ranges of Weak C—H···O and C—H··· $\pi$  Hydrogen Bond Distances and  $\pi$ ··· $\pi$  Interaction Distances Noticed From the Ternary Inclusion Compounds of Host **TP** with Guest Molecules

| code         | C—H···O<br><i>d</i> /Å | C—H··· $\pi$<br><i>d</i> /Å | $\pi$ ··· $\pi$<br><i>d</i> /Å |
|--------------|------------------------|-----------------------------|--------------------------------|
| <b>TP-PO</b> | 2.63 – 2.77            | 2.78 – 3.00                 | 3.78 – 3.80                    |
| <b>TP-PC</b> | 2.79 – 2.87            | 2.88 – 3.07                 | 3.79 – 3.81                    |
| <b>TP-MC</b> | 2.32 – 2.78            | 2.89 – 3.08                 | —                              |
| <b>TP-PB</b> | —                      | 2.77 – 2.98                 | 3.76 – 3.78                    |
| <b>TP-NP</b> | 2.55 – 2.76            | 2.81 – 3.09                 | —                              |
| <b>TP-FB</b> | 2.67 – 2.89            | 2.91 – 3.06                 | —                              |
| <b>TP-AO</b> | 2.63 – 2.75            | 2.92 – 3.01                 | —                              |
| <b>TP-BM</b> | 2.55 – 2.79            | 2.98 – 3.07                 | —                              |

**Table 4.** Observed Inter-molecular Interactions in all the Ternary Inclusion Compounds of Host **TP** with Guest Molecules

| Identification code | Interaction                         | d/Å   | θ/deg  |
|---------------------|-------------------------------------|-------|--------|
| <b>TP-PO</b>        | C <sub>51</sub> -H...O <sub>3</sub> | 2.777 | 120.78 |
|                     | C <sub>33</sub> -H...O <sub>1</sub> | 2.627 | 109.67 |
| <b>TP-PC</b>        | C <sub>51</sub> -H...O <sub>3</sub> | 2.798 | 133.91 |
| <b>TP-MC</b>        | C <sub>42</sub> -H...O <sub>1</sub> | 2.773 | 136.29 |
|                     | C <sub>59</sub> -H...O <sub>2</sub> | 2.689 | 144.03 |
|                     | C <sub>43</sub> -H...O <sub>1</sub> | 2.648 | 151.02 |
|                     | C <sub>61</sub> -H...O <sub>2</sub> | 2.600 | 162.22 |
|                     | C <sub>52</sub> -H...O <sub>3</sub> | 2.542 | 148.70 |
| <b>TP-NP</b>        | C <sub>62</sub> -H...O <sub>4</sub> | 2.316 | 152.10 |
|                     | C <sub>26</sub> -H...O <sub>2</sub> | 2.764 | 146.09 |
|                     | C <sub>26</sub> -H...O <sub>1</sub> | 2.551 | 124.94 |
|                     | C <sub>35</sub> -H...O <sub>2</sub> | 2.619 | 145.09 |
|                     | C <sub>39</sub> -H...O <sub>1</sub> | 2.445 | 131.46 |
| <b>TP-FB</b>        | C <sub>26</sub> -H...O <sub>1</sub> | 2.889 | 108.48 |
|                     | C <sub>26</sub> -H...O <sub>1</sub> | 2.873 | 109.56 |
|                     | C <sub>26</sub> -H...O <sub>2</sub> | 2.666 | 109.41 |
| <b>TP-AO</b>        | C <sub>43</sub> -H...O <sub>4</sub> | 2.626 | 169.94 |
|                     | C <sub>60</sub> -H...O <sub>3</sub> | 2.754 | 168.81 |
| <b>TP-MB</b>        | C <sub>52</sub> -H...O <sub>1</sub> | 2.797 | 133.27 |
|                     | C <sub>32</sub> -H...O <sub>5</sub> | 2.546 | 114.99 |

**Chart 1.** Molecular Structures of the Guests Used for Inclusion with the Host **TP**

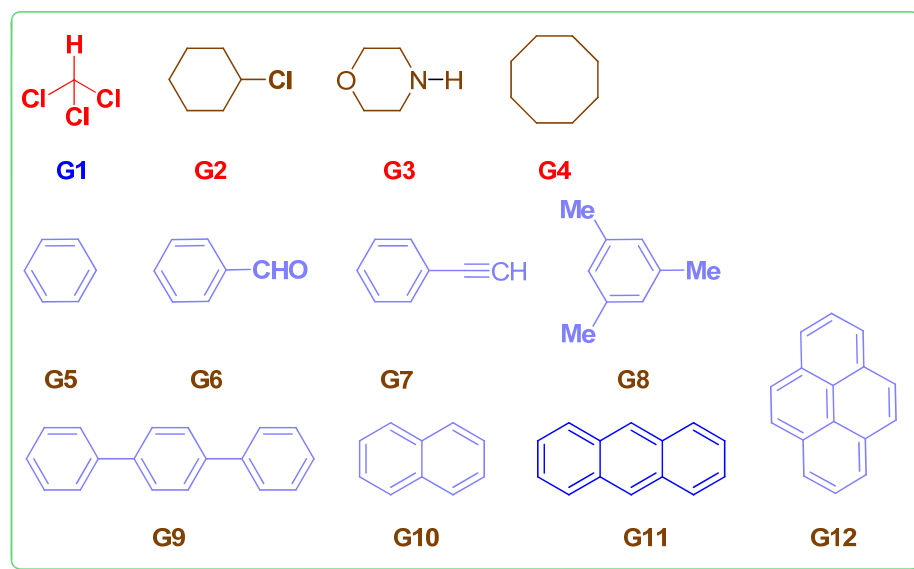

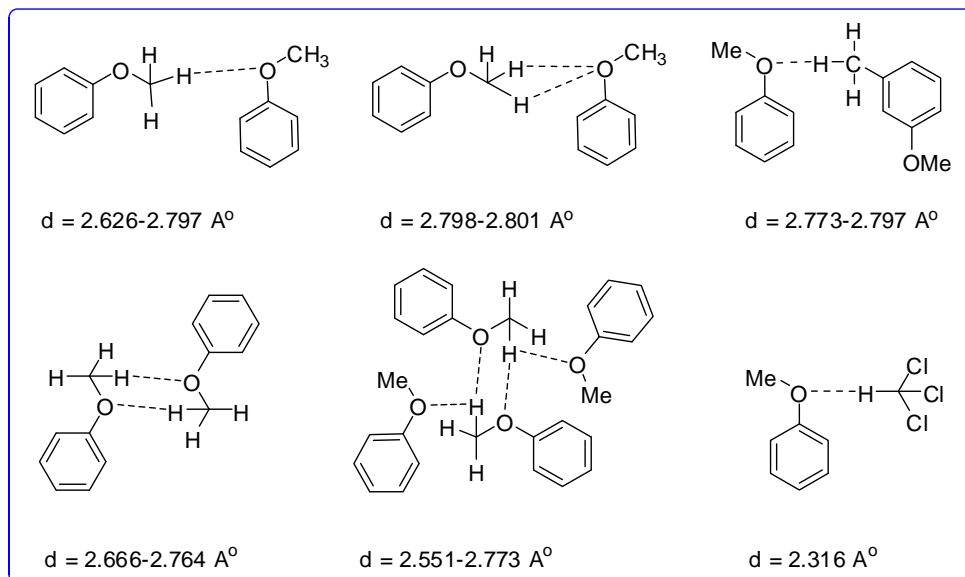

**Figure S1.** Weak C-H...O hydrogen bonds that are found in the crystal structures of the ternary inclusion compounds of **TP** with guest molecules.

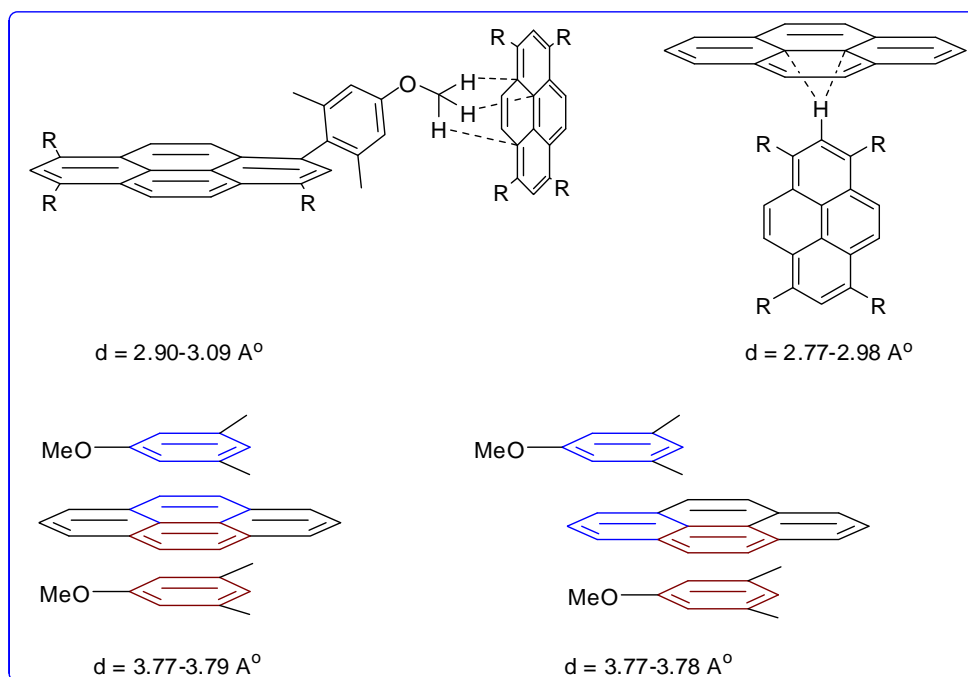

**Figure S2.** The edge-to-face C-H... $\pi$  interactions and face-to-face  $\pi$ - $\pi$  stacking observed between host-host and host-guest molecules in **TP** clathrates.



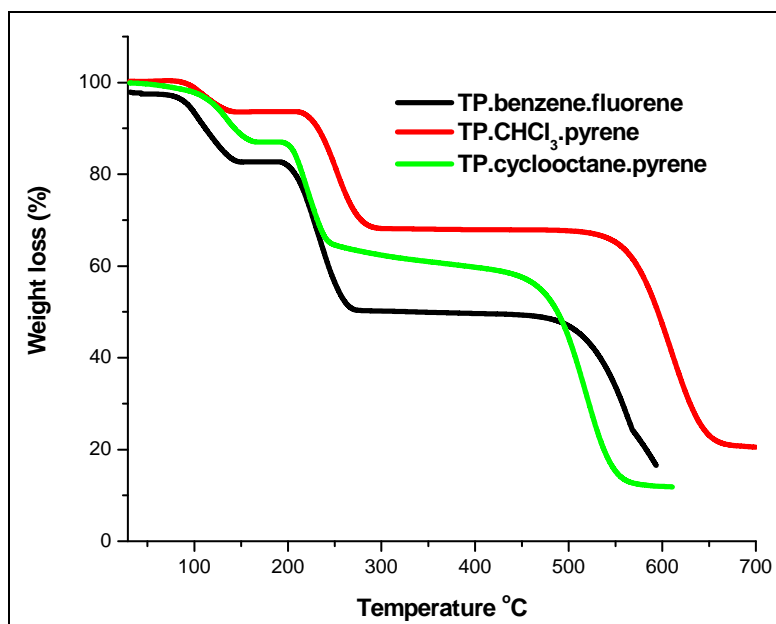

**Figure S3.** The TGA plots for the ternary inclusion compounds of **TP** with guest molecules pyrene+CHCl<sub>3</sub> (red), pyrene+cyclooctane (green) and fluorene+benzene (black).

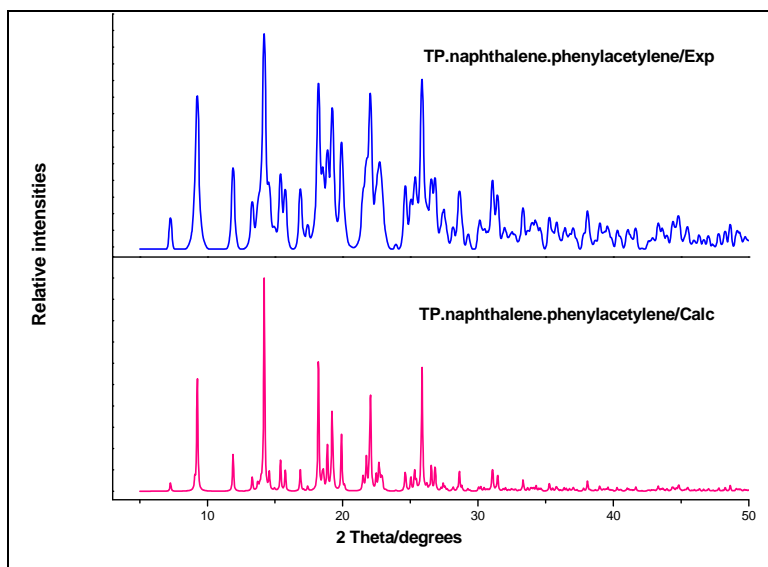

**Figure S4.** Top: powder X-ray diffraction pattern for the ternary inclusion compound of **TP**•naphthalene•phenylacetylene. Bottom: simulated PXRD pattern based on single crystal X-ray structure determination.

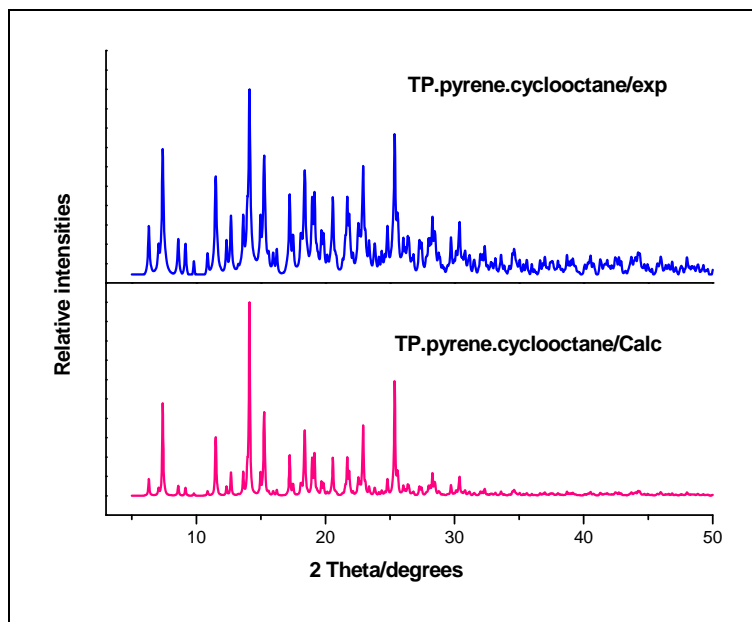

**Figure S5.** Top: powder X-ray diffraction pattern for the ternary inclusion compound of TP•pyrene•cyclooctane. Bottom: simulated PXRD pattern based on single crystal X-ray structure determination.

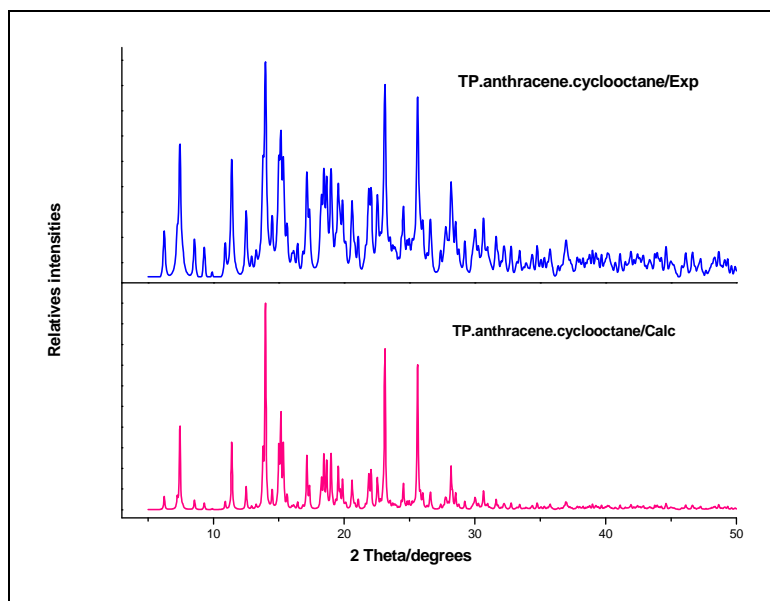

**Figure S6.** Top: powder X-ray diffraction pattern for the ternary inclusion compound of TP•anthracene•cyclooctane. Bottom: simulated PXRD pattern based on single crystal X-ray structure determination.

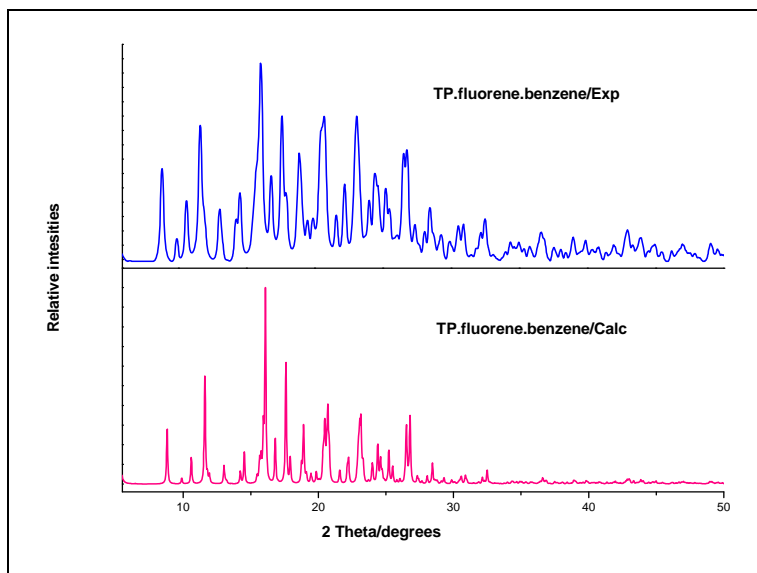

**Figure S7.** Top: powder X-ray diffraction pattern for the ternary inclusion compound of TP•fluorene•benzene. Bottom: simulated PXRD pattern based on single crystal X-ray structure determination.

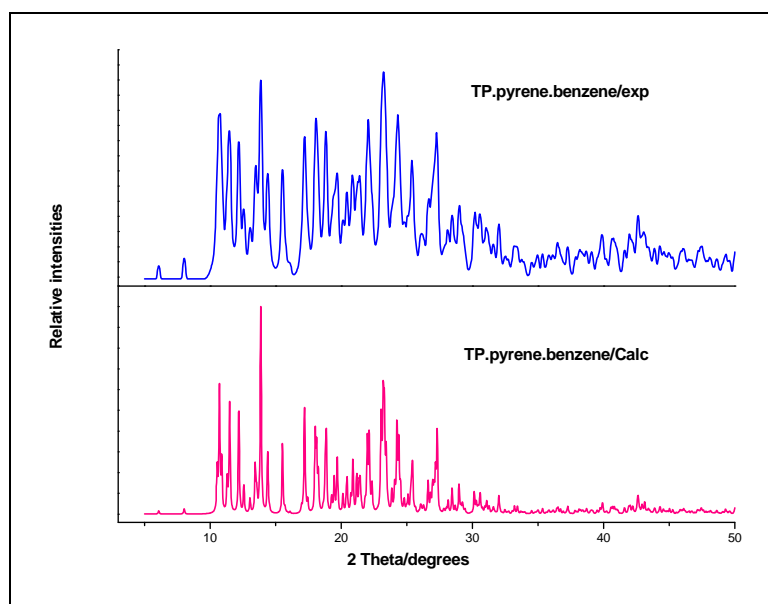

**Figure S8.** Top: powder X-ray diffraction pattern for the ternary inclusion compound of TP•pyrene•benzene. Bottom: simulated PXRD pattern based on single crystal X-ray structure determination.

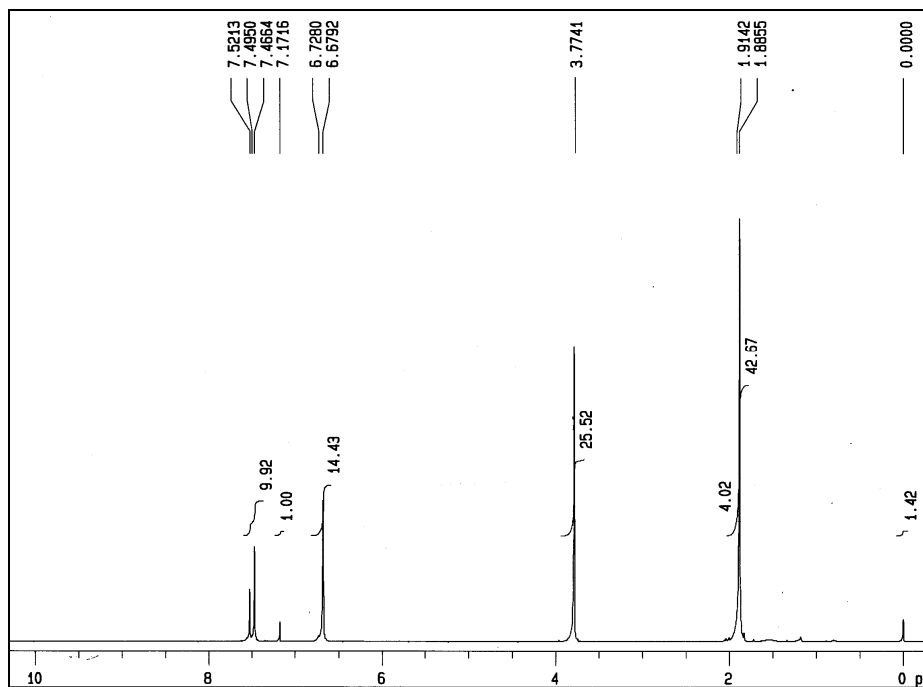

**Figure S9.** <sup>1</sup>H NMR spectrum of the host **TP** in CDCl<sub>3</sub>.

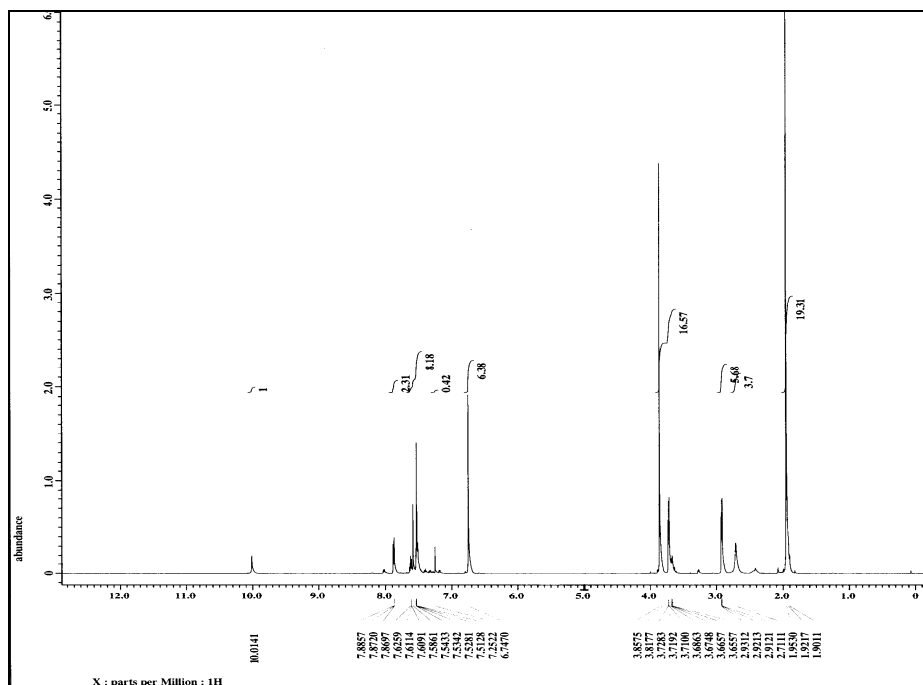

**Figure S10.** <sup>1</sup>H NMR spectrum for the ternary inclusion compound of **TP•benzaldehyde•morpholine** in CDCl<sub>3</sub>.

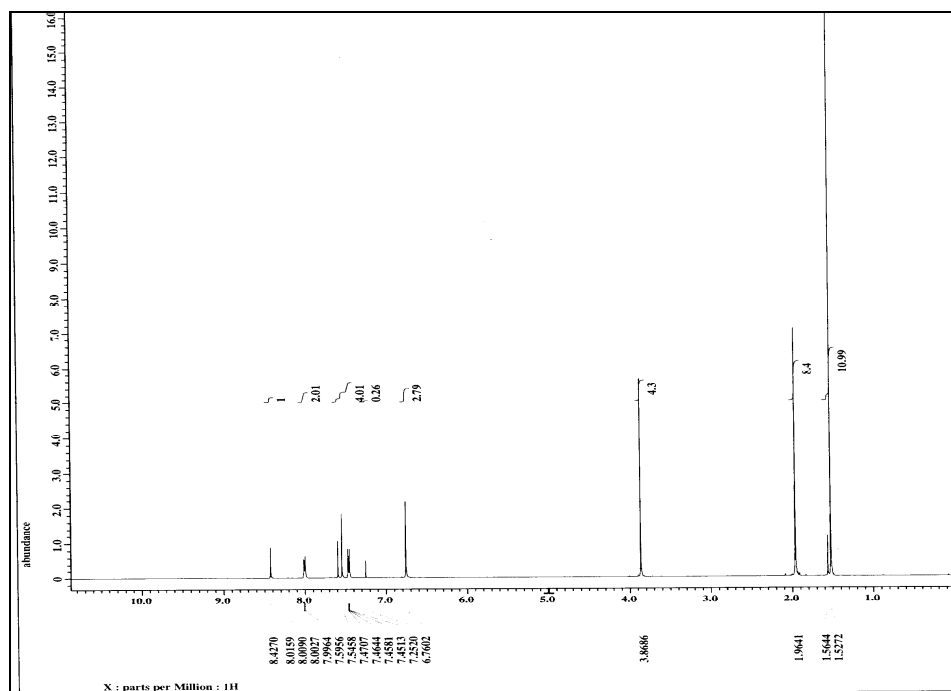

**Figure S11.** <sup>1</sup>H NMR spectrum for the ternary inclusion compound of TP•anthracene•cyclooctane in CDCl<sub>3</sub>

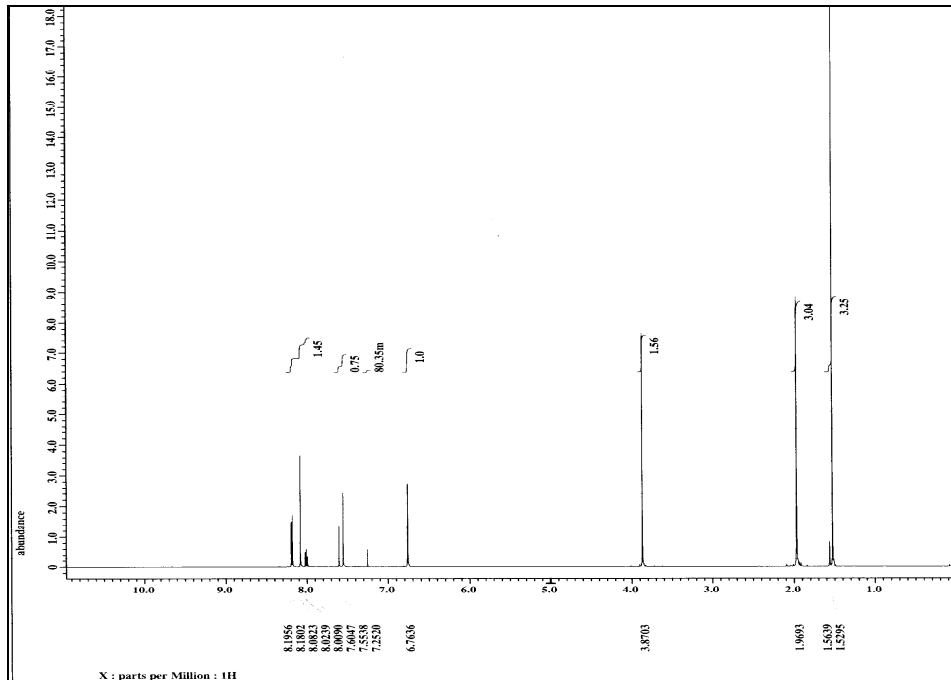

**Figure S12.** <sup>1</sup>H NMR spectrum for the ternary inclusion compound of TP•pyrene•cyclooctane in CDCl<sub>3</sub>.

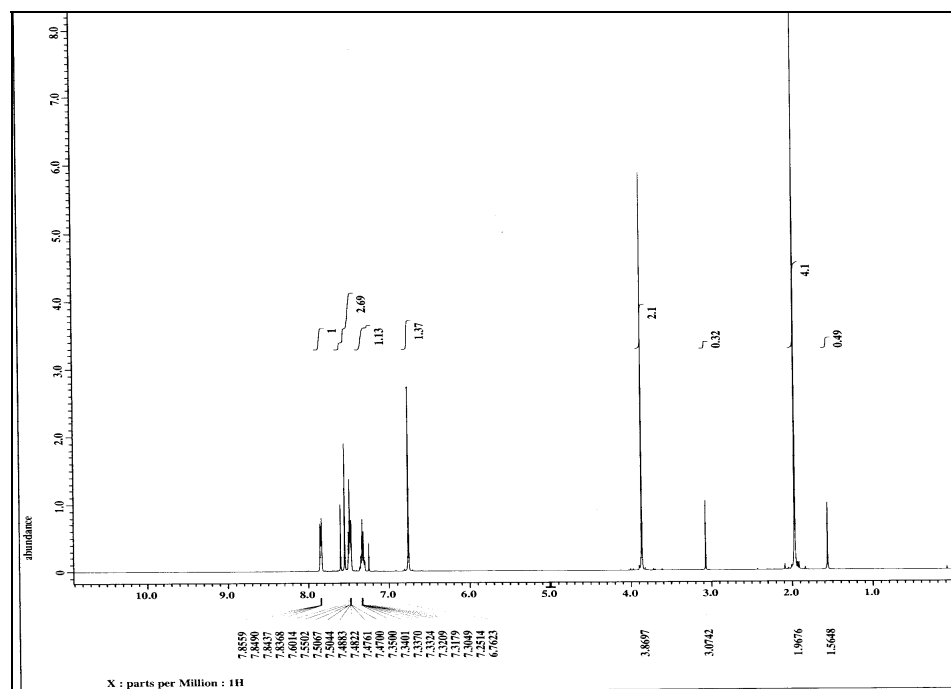

**Figure S13.**  $^1\text{H}$  NMR spectrum for the ternary inclusion compound of **TP•naphthalene•phenylacetylene** in  $\text{CDCl}_3$ .

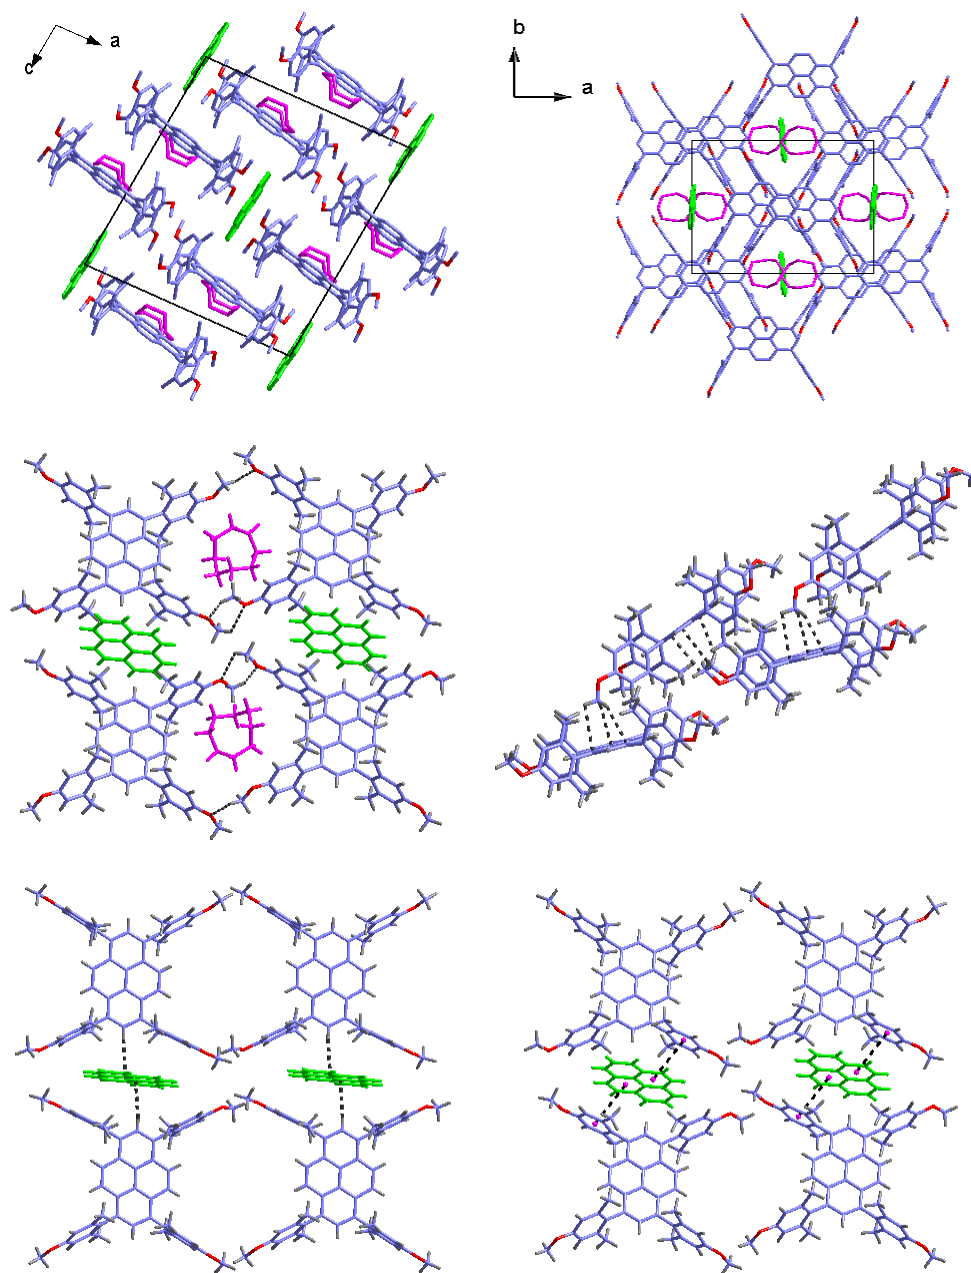

**Figure S14.** The crystal packing of the inclusion compound **TP•pyrene•cyclooctane** down b- and c-axes (top), the host molecules connected via both C–H $\cdots$ O and C–H $\cdots$  $\pi$  hydrogen bonds (middle) and observed C–H $\cdots$  $\pi$  and  $\pi\cdots\pi$  hydrogen bonds between the host and guest molecules (bottom).

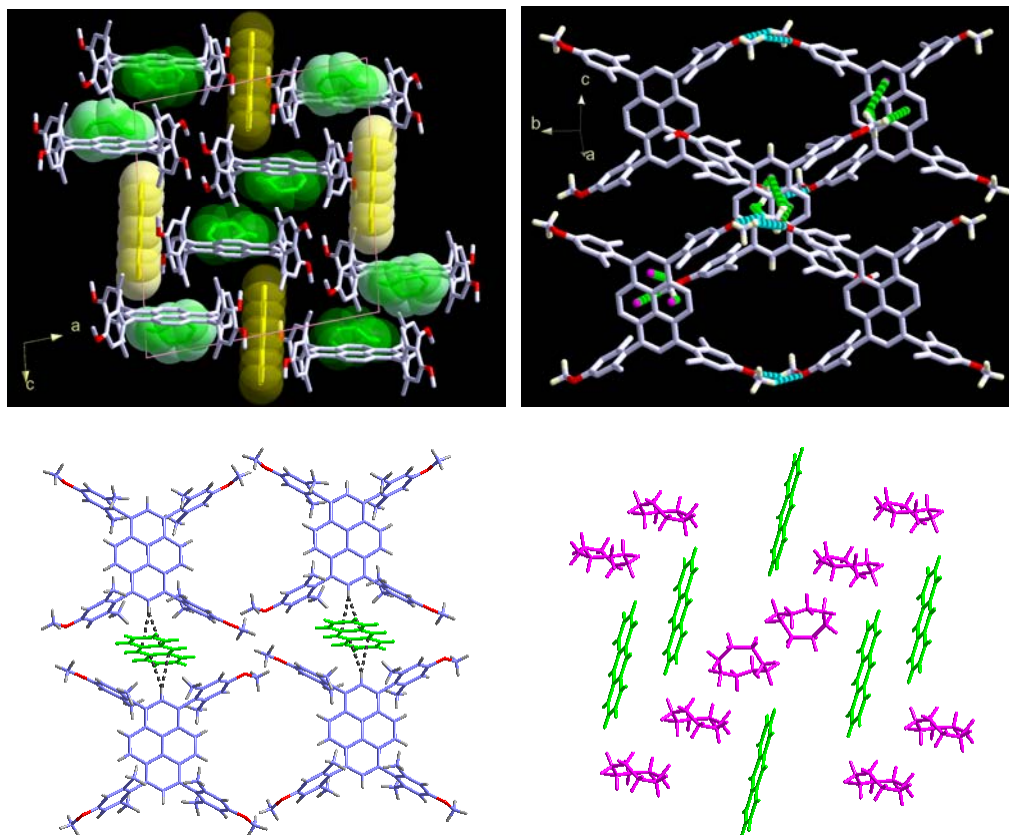

**Figure S15.** The crystal packing of the inclusion compound **TP•anthracene•cyclooctane** down b-axis (left). The host molecules connected via both C-H...O and C-H...π interaction (right) as in **TP-PO**.

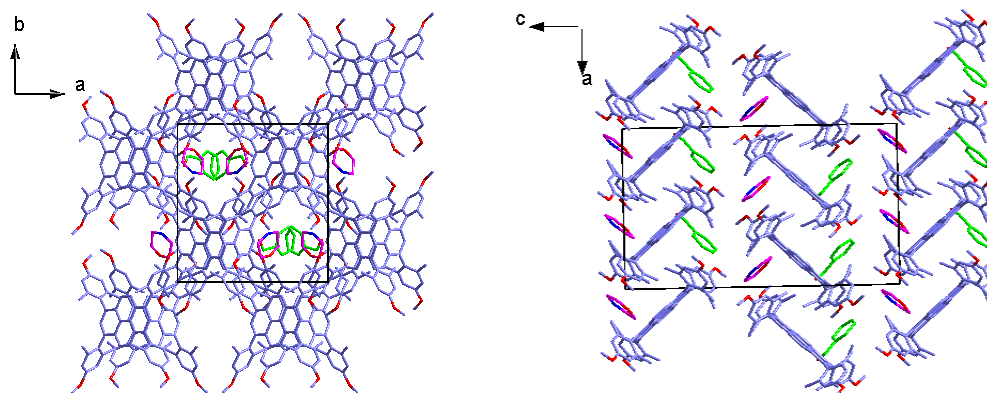



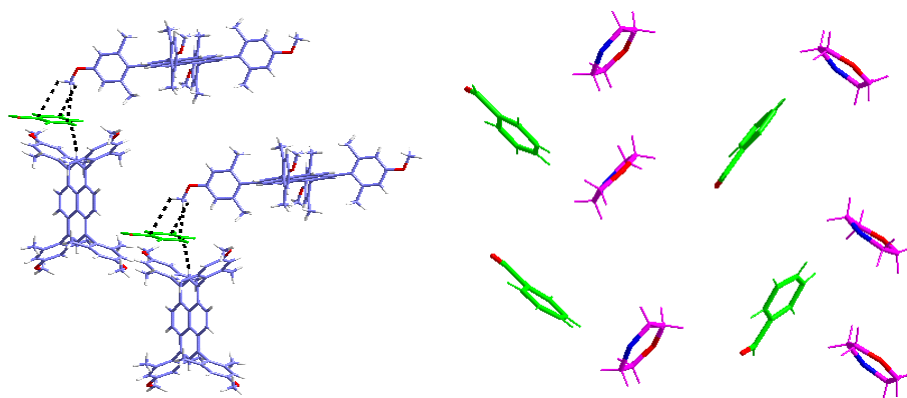

**Figure S16.** The crystal packing of the inclusion compound **TP•benzaldehyde•morpholine** down b-axis (left). The arrangement of host molecule alone down c-axis is shown in right.

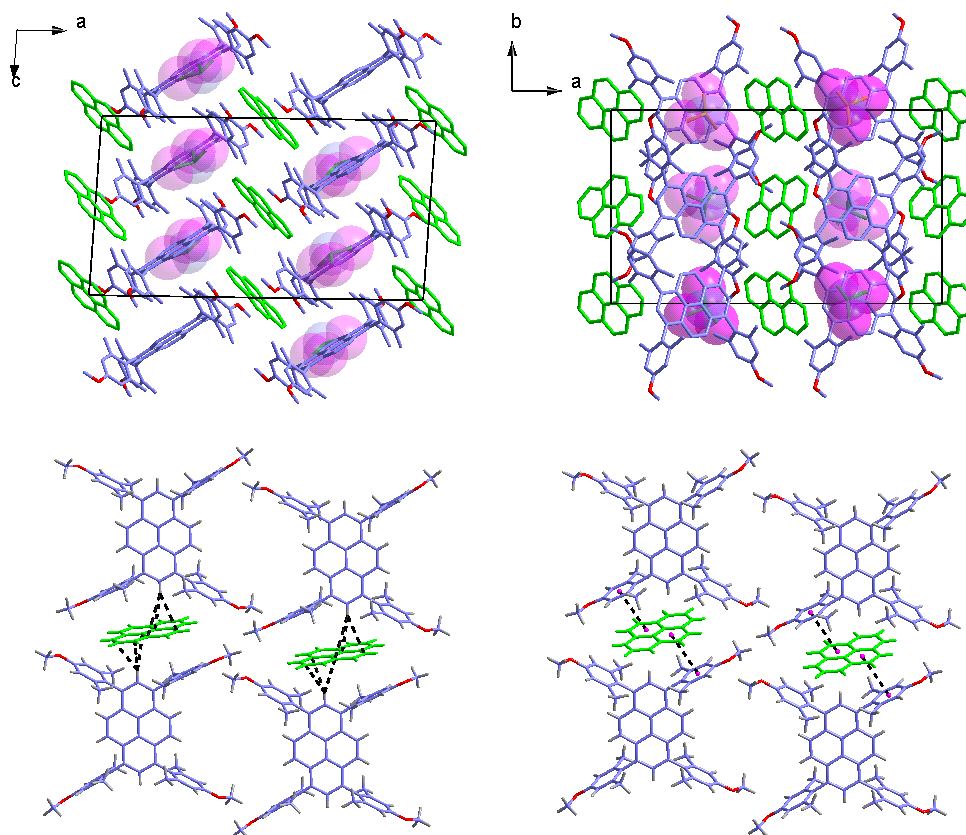

**Figure S17.** The crystal packing of **TP•pyrene•CHCl<sub>3</sub>**, notice that the host and guest molecules are stabilized by C–H···π (left). The host also interacts via C–H···O hydrogen bond (right).

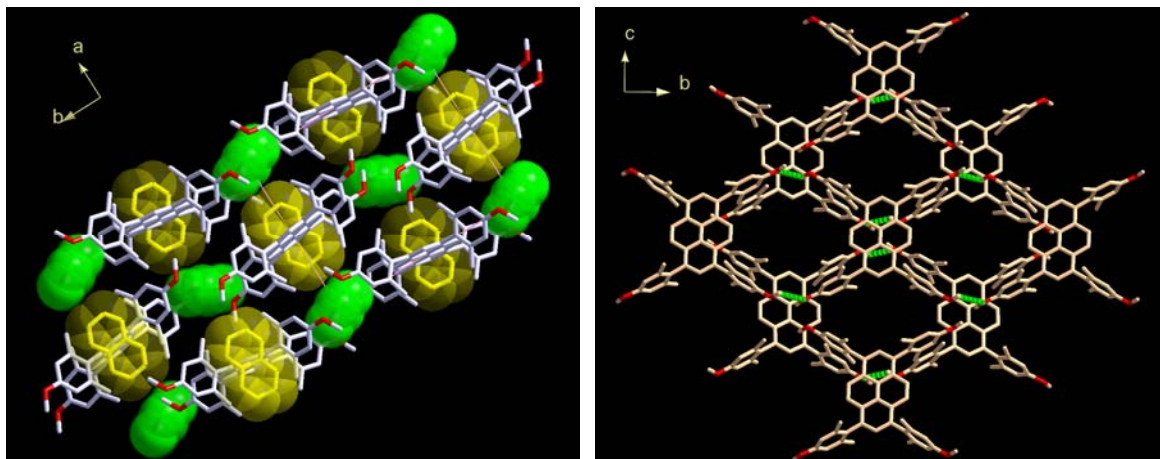

**Figure S18.** The molecular structure of TP•naphthalene•phenylacetylene down c-axis (left), notice that the host molecules are connected via C–H···O interactions (right).

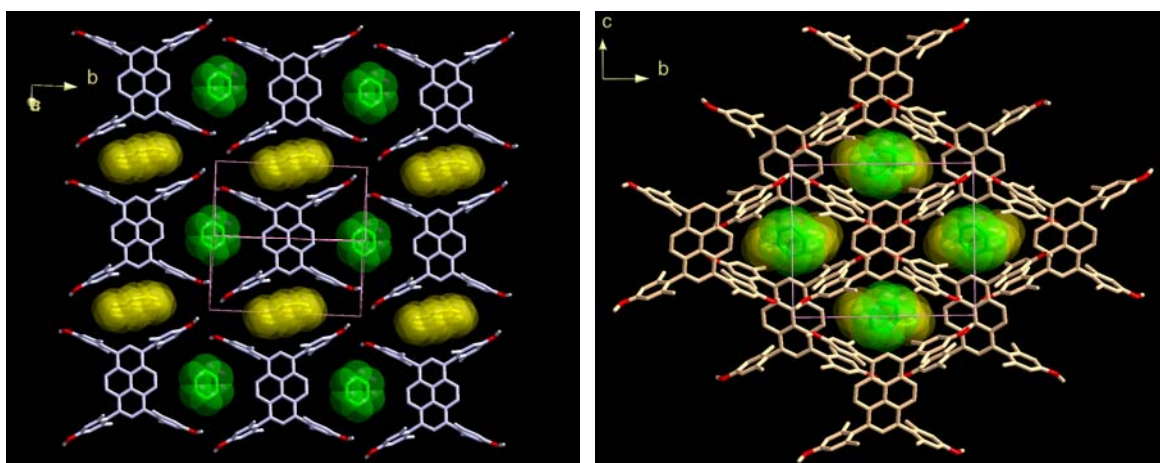

**Figure S19.** The molecular structure of TP•pyrene•benzene down c- (left) and a-axes (right). Notice that the larger size pyrene and small size benzene are bound in trough and concave domains of TP, respectively.

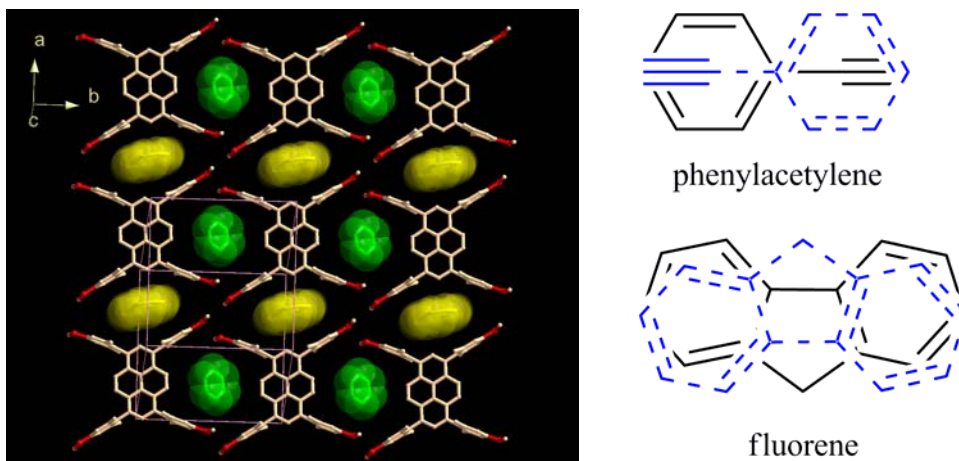

**Figure S20.** The molecular structure of **TP**•fluorene•benzene down c-axis (left), notice that the larger size fluorene and small size benzene are found in trough and concave domains of **TP**, respectively. Typical modes of disorder observed in the crystal structures of the inclusion compounds **TP** with guest phenylacetylene and fluorene shown in right.
